# Supplementary material for: That’s My Cue to Eat: A Systematic Review of the Persuasiveness of Front-of-Pack Cues on Food Packages for Children vs. Adults
Source: MDPI journal article supplement (doi:10.3390/nu12041062), 2020-04-11
Supplement: s1 [file s1]

| Domain                       | Search words        |    |
|------------------------------|---------------------|----|
| <b>Population</b>            | (Consumer*          | OR |
|                              | customer*           | OR |
| AND                          | child*              | OR |
|                              | adolescent*         | OR |
|                              | adult*              | OR |
|                              | senior*             | OR |
|                              | people*)            |    |
| <b>Intervention: Package</b> | (food               | OR |
|                              | beverage            | OR |
| AND                          | drink               | OR |
|                              | snack*)             |    |
|                              | AND                 |    |
|                              | (front-of-pack*     | OR |
|                              | FOP                 | OR |
|                              | On-pack             | OR |
|                              | packag*)            |    |
| <b>Intervention:</b>         | (marketing          | OR |
| <b>Cues</b>                  | visual              | OR |
|                              | sensory             | OR |
| AND                          | textual             | OR |
|                              | design)             |    |
|                              | AND                 |    |
|                              | (cue*               | OR |
|                              | attribute*          | OR |
|                              | technique*          | OR |
|                              | element*            | OR |
|                              | label)              |    |
|                              | (color*             | OR |
|                              | colour*)            |    |
|                              | typograph*          | OR |
|                              | (endorse*           | OR |
|                              | celebrit* endorse*) |    |

|       |                 |    |
|-------|-----------------|----|
| <hr/> |                 |    |
|       | OR              |    |
|       | ((cartoon*      | OR |
|       | licensed        | OR |
|       | fictional       | OR |
|       | brand)          |    |
|       | AND             |    |
|       | character*      | OR |
|       | figure)         |    |
| <hr/> |                 |    |
|       | (convenience    | OR |
|       | health          | OR |
|       | nutrition*      | OR |
|       | carbon          | OR |
|       | sustainab*      | OR |
|       | environment*)   |    |
|       | AND             |    |
|       | (information    | OR |
|       | message*        | OR |
|       | claim*          | OR |
|       | warning)        |    |
| <hr/> |                 |    |
|       | (health         | OR |
|       | calori*         | OR |
|       | nutrition       | OR |
|       | eco*            | OR |
|       | Sustainab*      | OR |
|       | environmental*  |    |
|       | serving size    |    |
|       | food )          |    |
|       | AND             |    |
|       | (label*         | OR |
|       | symbol*         | OR |
|       | table )         |    |
|       | OR              |    |
|       |                 | OR |
|       | (traffic light* |    |
| <hr/> |                 |    |

|                 |    |
|-----------------|----|
| nutri-score)    |    |
| (product        | OR |
| portion         | OR |
| food            | OR |
| ingredient      | OR |
| nutrient)       |    |
| AND             |    |
| (picture*       | OR |
| illustration*   | OR |
| size*           | OR |
| imag*           | OR |
| presentation*)  |    |
| (Brand          | OR |
| product)        |    |
| AND             |    |
| (logo*          | OR |
| slogan*         | OR |
| baseline*       | OR |
| tagline*        | OR |
| name*)          |    |
| (size*          | OR |
| partition*      | OR |
| serving*)       |    |
| shape*          |    |
| (material*      | OR |
| transparent     | OR |
| squeeze)        |    |
| seal*           | OR |
| call-to-action* | OR |
| game*           | OR |
| competition*    | OR |

|                     |                                                                                           |                                  |
|---------------------|-------------------------------------------------------------------------------------------|----------------------------------|
|                     | Collection*                                                                               | OR                               |
|                     | ((price<br>pricing<br>premium<br>quantity)                                                | OR<br>OR<br>OR                   |
|                     | AND                                                                                       |                                  |
|                     | (promotion*<br>discount*)                                                                 | OR                               |
|                     | OR                                                                                        | OR<br>OR                         |
|                     | (gift*<br>toy*<br>Premium))                                                               |                                  |
| <b>Outcome</b>      | ((food*<br>beverage*<br>AND<br>drink<br>snack*)                                           | OR<br>OR<br>OR                   |
|                     | AND                                                                                       |                                  |
|                     | (selection*<br>choice*<br>intake*<br>consumption*<br>amount*<br>behavior?*<br>purchase*)) | OR<br>OR<br>OR<br>OR<br>OR<br>OR |
|                     | OR                                                                                        |                                  |
|                     | energy*<br>diet<br>calori*<br>eat*<br>consum*                                             | OR<br>OR<br>OR<br>OR             |
| <b>Study design</b> | (experiment*<br>RCT                                                                       | OR<br>OR                         |

|                       |                             |    |
|-----------------------|-----------------------------|----|
|                       | randomized controlled trial | OR |
|                       | conjoint analysis           | OR |
|                       | intervention*               | OR |
|                       | lab study)                  |    |
| <b>Excluded terms</b> | (bacteri*                   | OR |
|                       | HIV                         | OR |
| NOT                   | pharmaceutical              | OR |
| (in title / abstract) | antimicrob*)                |    |
